# Supplementary material for: Continuity of care for TB patients at a South African hospital: A qualitative participatory study of the experiences of hospital staff
Source: PLOS journal article supplement (doi:10.1371/journal.pone.0222421), 2019-09-18
Supplement: S2 (10.1371/journal.pone.0222421.s002) [file journal.pone.0222421.s002]

# S1 ANALYSIS. CODING TREE

## DATA REDUCTION

| DESCRIPTIVE CODES                    |                                           |                                      |
|--------------------------------------|-------------------------------------------|--------------------------------------|
| Collaboration between health centres | Isolation of MDR-TB exposure              | Isolation and patients' behaviour    |
| Development since 2009               | Psychiatry case                           | Knowledge of TB cases                |
| Disclosure of HIV Status             | Quantity of TB drugs                      | Lack of isolation facilities         |
| DOTS' involvement                    | Size of drugs and adherence               | Notification of TB                   |
| Family involvement                   | Suggestions for better treatment outcomes | OBs and Gynae case and clinical use  |
| Fear of exposure of MDR-TB           | Unavailability of TB and HIV medication   | Patients attitude to health          |
| Fear of exposure to TB infection     | Unclear document and communication        | Patients' socio-economic situation   |
| Inadequate health education          | Ward stock of TB drugs                    | Patients' personal TB/HIV medication |
| Insufficient staff                   | Disclosure of HIV status                  | Preparation for discharge            |
| Interns' experience                  | Isolation and patient exposure            | Private and public experience        |

## DATA DISPLAY

### INFERENTIAL CODES LEADING TO EMERGING THEMES

#### REVIEWER 1

#### CLINICAL MANAGEMENT OF TB

- **FEAR OF EXPOSURE TO TB INFECTION**
  - MDR-TB
    - Staff and Patients
      - Why?
  - Direct linkages
    - Clinical problems
      - Unclear knowledge of TB patients
        - Some lying in corridors
        - Not enough beds
      - Lack of proper isolation facilities
  - Indirect linkages
    - Patients' health-seeking behaviour
      - Inconsistent in-take (concealing drugs) of TB medication in hospital
      - Non-adherence/non-persistent to Treatment at home or at primary care
- **INADEQUATE HEALTH EDUCATION AND COMMUNICATION BETWEEN STAFF**
  - Unclear documentation of TB cases
    - Why?
  - Direct linkages
    - No standard procedure or not properly followed
    - Unclear allocation of tasks as to who should teach and when to teach
  - Indirect linkages
    - Insufficient time because of workload
    - Not enough staff
    - No electronic data-base of TB patients
- **UNIQUE EXPERIENCES IN PSYCHIATRY AND GYNAECOLOGY AND OBSTETRICS**
  - **Psychiatry-how?**
    - Proper coordination/team work between staff
    - The nurse takes the leading role in patient education

- Clear documentation of patient information
- Adequate contact with primary care using fax
- Immediate follow-up of patients-linked to referrals category
- **Why?** Not clear!!!!
- **G & O – why?**
  - Very aware of the impact of TB on children
  - High-level of index because of reaching MDGs
  - Swift TB notification and dissemination of information

## REFERRAL PROCESS

- **IMPROPER COLLABORATION BETWEEN HOSPITAL AND REFERRAL CLINICS**
  - Why?
- Direct linkages
  - Confusion on who should do more patient education
  - Inadequate knowledge of patient's socio-economic situation affecting follow-up
  - No clear TB notification
  - No clear referral information
  - Inadequate transference of information to clinics as a result
- Indirect linkages
  - Patients' understanding of TB information to take charge of continuing treatment
  - Language barrier-Translation of information when treating patients coming from other parts of Africa
  - Patients and family's involvement in the process not clearly defined or adequate
- **SOCIO-ECONOMIC PROBLEMS OF PATIENTS**
  - How?
- Direct linkages
  - Poor living conditions
  - Lack of family support
  - inadequate understanding of TB message due to low educational level
- Indirect linkage
  - Poor health-seeking behaviour
  - Inadequate dissemination of patient housing location

## SUGGESTIONS FOR BETTER TREATMENT OUTCOME

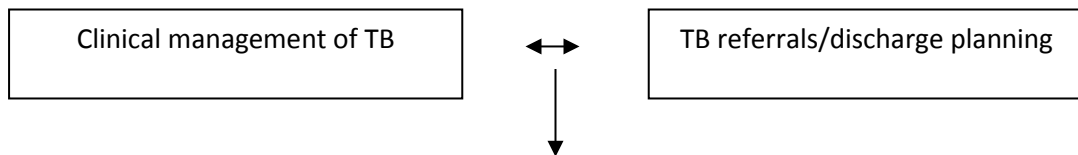

- Proper communication between staff treating TB patients-doctors and nurses
- Health care workers need to spend more time with patients-get to know their situation-be more empathetic
- Adequate communication between hospital and day clinic
- Have a TB coordinator/counsellor to coordinate TB referrals and link between the hospital and clinics, organises
- Standardise TB education/ information in a form of checklist/template
- Electronic data-base storing patient details

## DATA DISPLAY

### INFERENCEAL CODES LEADING TO EMERGING THEMES

#### REVIEWER 2

#### CARE MANAGEMENT PROCESS

##### FEAR OF EXPOSURE TO TB INFECTION

- **MDR-TB**
  - Staff and patients – occupational and environmental exposures
- **Clinical challenges**
  - Unclear/incomplete clinical/patient records
  - Lack of beds and respiratory isolation facilities
  - Low index of TB suspicion
  - Poor role modelling
- **Patient health-seeking behaviour**
  - Concealment of TB diagnosis/treatment
  - Poor treatment and isolation adherence in hospital
  - Poor treatment adherence at home or PHC

##### INADEQUATE TB EDUCATION AND SUPPORT FOR PATIENTS

- **Task shifting and not sharing**
  - Unclear understanding of roles, responsibilities and requirements
  - No standard approach for TB “induction” of patients
- **Insufficient time**
  - Workload
  - Inadequate number of staff (and with TB expertise)
- **Lack of health promoting resources**
  - Printed material and DVDs
  - Language and health literacy barriers

##### INADEQUATE TB COMMUNICATION BETWEEN STAFF

- **Poor documentation and coordination**
  - Absence/unclear documentation of TB cases (suspect/confirmed)
  - Partial handover on patient admission/transfer
  - Poor notification of TB cases
  - No electronic hospital database of all patients with TB
- **Hierarchy and territory**
  - Perceived professional parameters
  - Reluctance to track electronic results
  - Averseness to consult/confront the “other”

#### REFERRALS/DISCHARGE PROCESS

##### POOR DISCHARGE PLANNING

- **Lack of person-centredness and preparedness**
  - Inadequate assessment/knowledge of socio-economic conditions
  - Scanty patient/family/carer involvement in planning
  - Limited multi-disciplinary team consultation
  - Lack of linguistic and health literacy considerations
  - Deficient discharge information/instructions to patients/carers
- **Insufficient collaboration between hospital and referral points**
  - PHC level not included in discharge planning process
  - Unclear and/or incomplete discharge/referral information
  - Void of feedback on patients accessing PHC following discharge

## **SOCIO-ECONOMIC CONDITIONS OF PATIENTS**

- **Poor living conditions**
  - Poverty
  - Conflicting survival priorities
  - Lack of family/carer support
  - Perpetual TB exposure (returning to “pool of infection”)
- **Health literacy and agency**
  - Low education level
  - Poor health seeking behaviour
  - Submissive recipients of care
- **Strengthen TB-IPC**
  - Role modelling with accountability
  - Designated respiratory isolation facilities/wards
  - Rapid TB notification and contact screening
  - Sustain high index of suspicion (“TB in all”)
- **Improved communication and coordination at and across hospital and PHC levels**
  - Role and responsibility clarification
  - Enhanced standard of documentation and verbal communication
  - Standardised TB documentation and procedures
  - TB Discharge Checklist/template
  - Electronic TB database
  - TB Coordinator/counsellor to manage person-centred CoC
  - Early involvement of/notification to PHC referral point
- **Improved TB education for patients and staff**
  - Integrate time in nursing care plan for patient health education
  - Health promoting resources for patients/families/carers
  - Sustained in-service training of broader aspects of TB care – for multidisciplinary healthcare staff (day, night and agency workers)
- **Person-centred discharge planning**
  - Assessment of socio-economic conditions (barriers and enablers)
  - Assessment of and respond to linguistic and health literacy requirements
  - Early engagement of patient and family/carer
  - Promote patient agency

## VERIFYING CONCLUSIONS AND KEY THEMES BY BOTH REVIEWERS

| CATEGORIES                                                   | KEY THEMES                                                    | SUB-THEMES                                                      |
|--------------------------------------------------------------|---------------------------------------------------------------|-----------------------------------------------------------------|
| <b>Care Management Process</b>                               | Fear of exposure to TB infection                              | MDR-TB (Multidrug-Resistant TB)                                 |
|                                                              |                                                               | Clinical challenges                                             |
|                                                              |                                                               | Patient health-seeking behaviour                                |
|                                                              | Task shifting and not sharing                                 | Insufficient time and staff shortage                            |
|                                                              |                                                               | Lack of health education resources                              |
|                                                              | Poor documentation and coordination                           |                                                                 |
| Hierarchy and territory                                      |                                                               |                                                                 |
| <b>Discharge and referral process</b>                        | Poor discharge planning                                       | Lack of patient-centeredness and preparedness                   |
|                                                              |                                                               | Insufficient collaboration between hospital and referral points |
|                                                              | Socio-economic conditions of the patients                     | Poor living conditions                                          |
|                                                              |                                                               | Health literacy and personal agency                             |
| <b>Participant recommendations for health system actions</b> | Strengthen TB-IPC                                             |                                                                 |
|                                                              | Improved communication at and across hospitals and PHC levels |                                                                 |
|                                                              | Improved TB education for patients and staff                  |                                                                 |
|                                                              | Patient-centered discharge planning                           |                                                                 |
